# Supplementary material
Source: publisher site journal article supplement (https://www.dovepress.com/article/310625)
Supplement: Supplementary file 1 [file get_supplementary_file.php]

**Supplementary Table S1: Foundation Course Schedule**

**January 2021**

| **Module** | | **Time** | |
| --- | --- | --- | --- |
| **Day 1- Induction module** | |  | |
| Welcome address by Director | | 60 min | |
| Doctor: The Healer Scientist | | 60 min | |
| **Day 2- Induction module** | |  | |
| Welcome address by Dean | | 60 min | |
| About foundation course modules | | 60 min | |
| Online teaching- The basics | | 60 min | |
| Interaction among students | | 60 min | |
| **Day 3- Induction module** | |  | |
| Introduction to institution / campus / facilities  Rules and regulations of the institution | | 60 min | |
| Anti-ragging committee address | | 60 min | |
| Interaction among students | | 60 min | |
|  | |  | |
| **Day 4- Induction module** | |  | |
| Orientation Module: IMG roles/Overview MBBS curriculum | | 60 min | |
| Healthcare Ecosystem | | 60 min | |
| Overview MBBS curriculum various career pathways: Panel discussion | | 60 min | |
| History of Medicine and alternative systems | | 60 min | |
| **Day 5- Professional Development module** | |  | |
| Learning Skills- from a student to being a medical student | | 60 min | |
| How to Learn and Memory Graph | | 60 min | |
| Respect the cadaver | | 60 min | |
| Grooming Session 1/2 | | 60 min | |
| **Day 6 Professional Development module** | |  | |
| Sleep and academic performance | | 60 min | |
| Grooming Session 2/2 | | 60 min | |
| Nutrition and health | | 60 min | |
| Time Management | | 60 min | |
| **Day 7 Professional Development module** | |  | |
| Coming out of comfort zone | | 60 min | |
| Introduction to Mentorship (1/3) | | 60 min | |
| Mental health- Rejection, Failure, Depression and addictions - let us say NO | | 60 min | |
| Introduction to medical humanities | | 60 min | |
| **Day 8 Professional Development module** | |  | |
| Introduction to Mentorship (2/3) | | 60 min | |
| Hobby club entries | | 60 min | |
| Occupational Health Hazards and Vaccination | | 60 min | |
| **Day 9 Professional Development module** | |  | |
| Introduction to Mentorship (3/3) | | 60 min | |
| Stress management | | 60 min | |
| First year medical student in emergency and trauma | | 60 min | |
| Cultural and extracurricular Activities –  Humanities (Drama and theatre) | | 60 min | |
| **Day 10 Community orientation module** | |  | |
| Principles of family practice | | 60 min | |
| National Health goals and Policies/health care systems/community health | | 60 min | |
| Role of doctors in society –responsibilities, empathy and compassion | | 60 min | |
| Cultural and extracurricular Activities –  Humanities (Therapeutics of movement) | | 60 min | |
| **Day 11 Patient care module** | |  | |
| First Aid | | 60 min | |
| Medical Ethics and legalities in medicine  (right and wrong in medicine and good clinical practice) | | 60 min | |
| Significance of documentation in patient care and proper method of documentation | | 60 min | |
| Cultural and extracurricular Activities-  Humanities (Painting to de-stress) | | 60 min | |
| **Day 12 Research** | |  | |
| Use of Online Resources  Vancouver’s style of referencing | | 60 min | |
| Innovation, Patent, Paper writing | | 60 min | |
| AIIMS Research projects | | 60 min | |
| Cultural and extracurricular Activities-  Humanities (Photo expressions) | | 60 min | |
| **Day 13 Computer skills enhancement** | |  | |
| Computer skills  Making a word document and power point  Campus Management System and HIS | | 60 min | |
| Technology enhanced learning | | 60 min | |
| Cultural and extracurricular Activities  Humanities (Films as a medium of expression) | | 60 min | |
| **Day 14 Holistic treatment approach** | |  | |
| Holistic health and lifestyle management | | 60 min | |
| Alternative healthcare system and  Role of Yoga and Meditation in Today’s life | | 60 min | |
| Cultural and extracurricular Activities  Humanities (Narratives and Reflections ) | | 60 min | |
| **Day 15 Covid module** |  | |
| Infection Control: Infection Control Practices- Hand washing, Decontamination Use of PPEs Biomedical waste management | | 60 min | |
| History of Outbreaks, Epidemics & Pandemics | | 60 min | |
| The Covid 19 Pandemic | | 60 min | |
| Cultural and extracurricular Activities  Humanities (Doodling Art) | | 60 min | |
| **Day 16 Soft skills** | |  | |
| Communication | | 60 min | |
| Working in teams | | 60 min | |
| Empathy, Altruistic behaviour and 360-degree feedback  Conflict management | | 60 min | |
| Feedback | | 60 min | |
| Cultural and hobby extravaganza (E- exhibition) | | 120 min | |
